# Supplementary material
Source: PubMed Central journal article supplement (PMC8931145)
Supplement: 13280_2021_1649_MOESM1_ESM.pdf [file 13280_2021_1649_MOESM1_ESM.pdf]

***Ambio***

Electronic Supplementary Material

*This supplementary material has not been peer reviewed.*

Title: **Gendered Perceptions of Tiger Reintroduction in Rajasthan, India**

Authors: Kalli F. Doubleday, Elena C. Rubino

### Examples of Semi-Structured MG-FGD Questions

Notes: Question order was flexible depending on conversation; topic flow was directed by participants. Probes were used to further explore topics. Participants were free to introduce other topics that they perceived to be important.

1. How is it living near Sariska Tiger Reserve?
  - a. Benefits
  - b. Negatives
2. Are you aware of any legal protections afforded to wildlife that live near and move through your village/property/fields?
3. Please share your attitude towards Sariska's status as a Tiger Reserve and National Park:
  - a. Dislike (legal status should be dissolved)
  - b. Like (legal protection should be continued)
  - c. Indifference (no strong opinion)
4. How do you feel about the Forest Department laws in Sariska?
5. How would you describe a tiger? General attitude towards Tigers?
  - a. Dislike, why?
  - b. Like, why?
  - c. Indifference (no strong opinion), why?
6. Has anyone seen a tiger outside the reserve in their lifetime?
  - a. If yes: Could you describe the encounter, location, animal and your behavior towards one another?
  - b. If no, or not in significant time: Is it a good or bad thing tigers are not seen anymore?
  - c. How do you feel about tigers leaving the Park?
  - d. Do tigers come into the fields or villages?
  - e. Do they have a right to live outside the park boundaries?
  - f. Do they have a right to move through your property/ into town?
7. Have you heard about all tigers being lost from Sariska in 2004-5?
  - a. If yes, how did you feel when hearing this news?
  - b. How did you feel about Sariska after hearing this news?
8. Are there any benefits or negatives from the extirpation ("total loss") of Sariska's tigers in 2004-5?
9. Did they hear about tigers being reintroduced in 2009?
  - a. If yes, how did they hear about the reintroduction (type of media)?
  - b. If yes, how did you feel when hearing this news?
  - c. How did you feel about the park after hearing this news?

10. Are there any benefits or negatives from the reintroduction and now ~10 tigers in Sariska?
11. Does seeing or hearing about a tiger being outside the park change your daily routine?
12. How will they feel when 10 tigers grow to a larger population of tigers, like 20 tigers?
13. How do you feel about the wall around Sariska?
  - a. Are they sufficient? Any other walls needed?
